# Supplementary material for: Association of elevated fractional exhaled nitric oxide concentration and blood eosinophil count with severe asthma exacerbations
Source: Springer Nature journal article supplement (doi:10.1186/s13601-019-0282-7), 2019-08-20
Supplement: MOESM1 [file 13601_2019_282_MOESM1_ESM.pdf]

Additional file 1: Table S1. Statistically significant differences between unmatched patient groups (categorisation 1)

| <b>Characteristics</b>           |                       | <b>Non-high<br/>blood<br/>eosinophil<br/>and low<br/>FeNO</b> | <b>Non-high<br/>blood<br/>eosinophil<br/>and medium<br/>FeNO</b> | <b>Non-high<br/>blood<br/>eosinophil<br/>and high<br/>FeNO</b> | <b>High blood<br/>eosinophil<br/>and low<br/>FeNO</b> | <b>High blood<br/>eosinophil<br/>and medium<br/>FeNO</b> | <b>High blood<br/>eosinophil<br/>and high<br/>FeNO</b> | <b>p-value</b> |
|----------------------------------|-----------------------|---------------------------------------------------------------|------------------------------------------------------------------|----------------------------------------------------------------|-------------------------------------------------------|----------------------------------------------------------|--------------------------------------------------------|----------------|
| <b>Categorised<br/>age group</b> | n (% non-<br>missing) | 296 (100.0)                                                   | 72 (100.0)                                                       | 26 (100.0)                                                     | 122 (100.0)                                           | 67 (100.0)                                               | 27 (100.0)                                             | <0.0001        |
|                                  | Under 35              | 28 (9.5)                                                      | 12 (16.7)                                                        | 8 (30.8)                                                       | 12 (9.8)                                              | 6 (9.0)                                                  | 12 (44.4)                                              |                |
|                                  | 35–65                 | 229 (77.4)                                                    | 49 (68.1)                                                        | 14 (53.8)                                                      | 90 (73.8)                                             | 48 (71.6)                                                | 9 (33.3)                                               |                |
|                                  | 66–80                 | 39 (13.2)                                                     | 11 (15.3)                                                        | 4 (15.4)                                                       | 20 (16.4)                                             | 13 (19.4)                                                | 6 (22.2)                                               |                |
| <b>Sex</b>                       | n (% non-<br>missing) | 296 (100.0)                                                   | 72 (100.0)                                                       | 26 (100.0)                                                     | 122 (100.0)                                           | 67 (100.0)                                               | 27 (100.0)                                             | 0.0028         |
|                                  | Male                  | 93 (31.4)                                                     | 25 (34.7)                                                        | 14 (53.8)                                                      | 52 (42.6)                                             | 37 (55.2)                                                | 10 (37.0)                                              |                |
| <b>Smoking<br/>status</b>        | n (% non-<br>missing) | 245 (82.8)                                                    | 62 (86.1)                                                        | 22 (84.6)                                                      | 101 (82.8)                                            | 60 (89.6)                                                | 22 (81.5)                                              | 0.0007         |

|                              |                   |             |            |            |             |            |            |        |
|------------------------------|-------------------|-------------|------------|------------|-------------|------------|------------|--------|
|                              | Non-smoker        | 110 (44.9)  | 36 (58.1)  | 15 (68.2)  | 30 (29.7)   | 32 (53.3)  | 14 (63.6)  |        |
|                              | Ex-smoker         | 35 (14.3)   | 7 (11.3)   | 3 (13.6)   | 29 (28.7)   | 6 (10.0)   | 2 (9.1)    |        |
|                              | Current smoker    | 100 (40.8)  | 19 (30.6)  | 4 (18.2)   | 42 (41.6)   | 22 (36.7)  | 6 (27.3)   |        |
| <b>BMI</b>                   | n (% non-missing) | 280 (94.6)  | 70 (97.2)  | 24 (92.3)  | 118 (96.7)  | 63 (94.0)  | 26 (96.3)  | 0.0022 |
|                              | Mean (SD)         | 30.0 (6.7)  | 29.5 (6.1) | 26.3 (5.3) | 30.8 (7.6)  | 28.2 (7.1) | 26.9 (6.4) |        |
| <b>Eczema diagnosis</b>      | n (% non-missing) | 296 (100.0) | 72 (100.0) | 26 (100.0) | 122 (100.0) | 67 (100.0) | 27 (100.0) | 0.0405 |
|                              | Yes               | 78 (26.4)   | 23 (31.9)  | 5 (19.2)   | 49 (40.2)   | 17 (25.4)  | 11 (40.7)  |        |
| <b>Rhinitis diagnosis</b>    | n (% non-missing) | 296 (100.0) | 72 (100.0) | 26 (100.0) | 122 (100.0) | 67 (100.0) | 27 (100.0) | 0.0270 |
|                              | Yes               | 114 (38.5)  | 24 (33.3)  | 5 (19.2)   | 52 (42.6)   | 36 (53.7)  | 13 (48.1)  |        |
| <b>GERD active diagnosis</b> | n (% non-missing) | 296 (100.0) | 72 (100.0) | 26 (100.0) | 122 (100.0) | 67 (100.0) | 27 (100.0) | 0.0223 |
|                              | Yes               | 50 (16.9)   | 5 (6.9)    | 1 (3.8)    | 13 (10.7)   | 10 (14.9)  | 0 (0.0)    |        |

|                                           |                   |               |               |               |               |               |               |        |
|-------------------------------------------|-------------------|---------------|---------------|---------------|---------------|---------------|---------------|--------|
| <b>Current peak flow</b>                  | n (% non-missing) | 160 (54.1)    | 49 (68.1)     | 19 (73.1)     | 57 (46.7)     | 42 (62.7)     | 20 (74.1)     | 0.0285 |
|                                           | Mean (SD)         | 401.3 (102.9) | 403.6 (112.7) | 431.1 (123.3) | 423.6 (132.1) | 469.8 (111.2) | 406.0 (142.4) |        |
| <b>Predicted peak flow</b>                | n (% non-missing) | 158 (53.4)    | 49 (68.1)     | 19 (73.1)     | 57 (46.7)     | 42 (62.7)     | 20 (74.1)     | 0.0032 |
|                                           | Mean (SD)         | 495.7 (71.4)  | 503.2 (79.3)  | 542.6 (60.1)  | 526.8 (81.3)  | 534.8 (69.7)  | 505.8 (74.9)  |        |
| <b>FEV<sub>1</sub> % predicted groups</b> | n (% non-missing) | 55 (18.6)     | 10 (13.9)     | 4 (15.4)      | 28 (23.0)     | 13 (19.4)     | 5 (18.5)      | 0.0456 |
|                                           | 50% or less       | 12 (21.8)     | 1 (10.0)      | 1 (25.0)      | 10 (35.7)     | 9 (69.2)      | 1 (20.0)      |        |
|                                           | >50% to <80%      | 13 (23.6)     | 4 (40.0)      | 1 (25.0)      | 8 (28.6)      | 0 (0.0)       | 1 (20.0)      |        |
|                                           | 80% to <100%      | 15 (27.3)     | 4 (40.0)      | 2 (50.0)      | 3 (10.7)      | 2 (15.4)      | 3 (60.0)      |        |
|                                           | 100%+             | 15 (27.3)     | 1 (10.0)      | 0 (0.0)       | 7 (25.0)      | 2 (15.4)      | 0 (0.0)       |        |
| <b>Asthma consultations</b>               | n (% non-missing) | 296 (100.0)   | 72 (100.0)    | 26 (100.0)    | 122 (100.0)   | 67 (100.0)    | 27 (100.0)    | 0.0446 |

|                                                      |                   |               |               |               |               |               |               |        |
|------------------------------------------------------|-------------------|---------------|---------------|---------------|---------------|---------------|---------------|--------|
|                                                      | Mean (SD)         | 1.8 (1.5)     | 2.3 (1.8)     | 2.5 (2.6)     | 1.7 (1.3)     | 1.9 (2.0)     | 2.3 (1.4)     |        |
| <b>Asthma related unplanned inpatient attendance</b> | n (% non-missing) | 296 (100.0)   | 72 (100.0)    | 26 (100.0)    | 122 (100.0)   | 67 (100.0)    | 27 (100.0)    | 0.0163 |
|                                                      | Yes               | 0 (0.0)       | 0 (0.0)       | 0 (0.0)       | 0 (0.0)       | 1 (1.5)       | 1 (3.7)       |        |
| <b>ICS/LABA prescriptions per patient</b>            | n (% non-missing) | 296 (100.0)   | 72 (100.0)    | 26 (100.0)    | 122 (100.0)   | 67 (100.0)    | 27 (100.0)    | 0.0096 |
|                                                      | Mean (SD)         | 4.2 (4.1)     | 3.2 (3.5)     | 2.5 (3.0)     | 4.9 (3.9)     | 4.2 (4.3)     | 3.2 (2.5)     |        |
| <b>ICS daily dose</b>                                | n (% non-missing) | 296 (100.0)   | 72 (100.0)    | 26 (100.0)    | 122 (100.0)   | 67 (100.0)    | 27 (100.0)    | 0.0454 |
|                                                      | Mean (SD)         | 586.9 (503.5) | 549.4 (477.0) | 357.4 (349.2) | 623.2 (497.7) | 588.3 (523.4) | 443.6 (342.1) |        |
| <b>ICS inhalers</b>                                  | n (% non-missing) | 296 (100.0)   | 72 (100.0)    | 26 (100.0)    | 122 (100.0)   | 67 (100.0)    | 27 (100.0)    | 0.0165 |
|                                                      | Mean (SD)         | 7.0 (5.2)     | 5.9 (3.9)     | 4.3 (4.3)     | 6.9 (4.6)     | 6.9 (5.4)     | 5.1 (2.8)     |        |
| <b>ICS</b>                                           | n (% non-missing) | 296 (100.0)   | 72 (100.0)    | 26 (100.0)    | 122 (100.0)   | 67 (100.0)    | 27 (100.0)    | 0.0043 |

|                                          |                   |             |            |            |             |            |            |        |
|------------------------------------------|-------------------|-------------|------------|------------|-------------|------------|------------|--------|
| <b>prescriptions</b>                     | missing)          |             |            |            |             |            |            |        |
|                                          | Mean (SD)         | 5.6 (3.8)   | 4.5 (3.3)  | 3.3 (3.1)  | 5.5 (3.6)   | 5.1 (3.9)  | 4.4 (2.3)  |        |
| <b>Number of ICS containing inhalers</b> | n (% non-missing) | 296 (100.0) | 72 (100.0) | 26 (100.0) | 122 (100.0) | 67 (100.0) | 27 (100.0) | 0.0010 |
|                                          | 1–3               | 90 (30.4)   | 24 (33.3)  | 17 (65.4)  | 36 (29.5)   | 23 (34.3)  | 7 (25.9)   |        |
|                                          | 4–6               | 76 (25.7)   | 25 (34.7)  | 4 (15.4)   | 27 (22.1)   | 16 (23.9)  | 14 (51.9)  |        |
|                                          | ≥7                | 130 (43.9)  | 23 (31.9)  | 5 (19.2)   | 59 (48.4)   | 28 (41.8)  | 6 (22.2)   |        |
| <b>Mean daily ICS dosage (µg)</b>        | n (% non-missing) | 296 (100.0) | 72 (100.0) | 26 (100.0) | 122 (100.0) | 67 (100.0) | 27 (100.0) | 0.0026 |
|                                          | <250              | 89 (30.1)   | 22 (30.6)  | 16 (61.5)  | 30 (24.6)   | 21 (31.3)  | 8 (29.6)   |        |
|                                          | 250 to <500       | 74 (25.0)   | 24 (33.3)  | 4 (15.4)   | 32 (26.2)   | 19 (28.4)  | 14 (51.9)  |        |
|                                          | ≥500              | 133 (44.9)  | 26 (36.1)  | 6 (23.1)   | 60 (49.2)   | 27 (40.3)  | 5 (18.5)   |        |

All values in the table are n (%) unless otherwise specified. High FeNO defined as ≥50 ppb; medium FeNO, 25 to <50 ppb; low FeNO <25 ppb; high blood eosinophil count defined as ≥0.300×10<sup>9</sup> cells/L; non-high blood eosinophil count <0.300×10<sup>9</sup> cells/L.

BMI, body mass index; FeNO, fractional exhaled nitric oxide; FEV, forced expiratory volume; GERD, gastroesophageal reflux disease; ICS, inhaled corticosteroid; LABA, long-acting β<sub>2</sub>-agonist; ppb, parts per billion; SABA, short-acting β<sub>2</sub>-agonist; SD, standard deviation

Additional file 1: Table S2. Statistically significant difference between unmatched patient groups (categorisation 2)

| <b>Characteristics</b> |                   | <b>Non-high eosinophil and non-high FeNO</b> | <b>Non-high eosinophil and high FeNO</b> | <b>High eosinophil and non-high FeNO</b> | <b>High eosinophil and high FeNO</b> | <b>p-value</b> |
|------------------------|-------------------|----------------------------------------------|------------------------------------------|------------------------------------------|--------------------------------------|----------------|
| <b>Sex</b>             | n (% non-missing) | 347 (100.0)                                  | 47 (100.0)                               | 161 (100.0)                              | 55 (100.0)                           | 0.0177         |
|                        | Male              | 113 (32.6)                                   | 19 (40.4)                                | 74 (46.0)                                | 25 (45.5)                            |                |
| <b>Smoking status</b>  | n (% non-missing) | 347 (100.0)                                  | 47 (100.0)                               | 161 (100.0)                              | 55 (100.0)                           | 0.0115         |
|                        | Non-smoker        | 138 (39.8)                                   | 23 (48.9)                                | 45 (28.0)                                | 31 (56.4)                            |                |
|                        | Ex-smoker         | 40 (11.5)                                    | 5 (10.6)                                 | 32 (19.9)                                | 5 (9.1)                              |                |
|                        | Current smoker    | 111 (32.0)                                   | 12 (25.5)                                | 58 (36.0)                                | 12 (21.8)                            |                |
| <b>BMI</b>             | n (% non-missing) | 331 (95.4)                                   | 43 (91.5)                                | 155 (96.3)                               | 51 (92.7)                            | 0.0005         |

|                                   |                   |             |            |             |            |        |
|-----------------------------------|-------------------|-------------|------------|-------------|------------|--------|
|                                   | Mean (SD)         | 29.9 (6.5)  | 27.8 (6.9) | 30.4 (7.8)  | 26.7 (5.6) |        |
| <b>BMI</b>                        | n (% non-missing) | 347 (100.0) | 47 (100.0) | 161 (100.0) | 55 (100.0) | 0.0411 |
|                                   | Underweight       | 1 (0.3)     | 0 (0.0)    | 2 (1.2)     | 1 (1.8)    |        |
|                                   | Normal            | 81 (23.3)   | 19 (40.4)  | 36 (22.4)   | 20 (36.4)  |        |
|                                   | Overweight        | 102 (29.4)  | 8 (17.0)   | 48 (29.8)   | 18 (32.7)  |        |
|                                   | Obese             | 147 (42.4)  | 16 (34.0)  | 69 (42.9)   | 12 (21.8)  |        |
| <b>Mean daily ICS dosage (µg)</b> | n (% non-missing) | 347 (100.0) | 47 (100.0) | 161 (100.0) | 55 (100.0) | 0.0133 |
|                                   | <250              | 103 (29.7)  | 24 (51.1)  | 44 (27.3)   | 15 (27.3)  |        |
|                                   | 250 to <500       | 91 (26.2)   | 11 (23.4)  | 43 (26.7)   | 22 (40.0)  |        |
|                                   | ≥500              | 153 (44.1)  | 12 (25.5)  | 74 (46.0)   | 18 (32.7)  |        |
| <b>Asthma ATS exacerbations</b>   | n (% non-missing) | 347 (100.0) | 47 (100.0) | 161 (100.0) | 55 (100.0) | 0.0403 |
|                                   | Mean (SD)         | 0.4 (0.7)   | 0.3 (0.5)  | 0.4 (0.8)   | 0.7 (0.9)  |        |
| <b>Medication</b>                 | n (% non-missing) | 340 (98.0)  | 45 (95.7)  | 158 (98.1)  | 55 (100.0) | 0.0062 |

|                                           |                   |               |               |               |               |        |
|-------------------------------------------|-------------------|---------------|---------------|---------------|---------------|--------|
| <b>cost</b>                               | missing)          |               |               |               |               |        |
|                                           | Mean (SD)         | 268.5 (228.1) | 189.6 (222.1) | 285.6 (238.2) | 251.6 (231.6) |        |
| <b>ICS daily dose</b>                     | n (% non-missing) | 347 (100.0)   | 47 (100.0)    | 161 (100.0)   | 55 (100.0)    | 0.0153 |
|                                           | Mean (SD)         | 587.2 (498.6) | 399.9 (411.7) | 601.5 (498.1) | 555.9 (472.0) |        |
| <b>ICS inhalers</b>                       | n (% non-missing) | 347 (100.0)   | 47 (100.0)    | 161 (100.0)   | 55 (100.0)    | 0.0219 |
|                                           | Mean (SD)         | 6.9 (5.1)     | 4.9 (4.0)     | 6.7 (4.5)     | 6.4 (5.3)     |        |
| <b>ICS prescriptions</b>                  | n (% non-missing) | 347 (100.0)   | 47 (100.0)    | 161 (100.0)   | 55 (100.0)    | 0.0100 |
|                                           | Mean (SD)         | 5.4 (3.7)     | 3.8 (3.3)     | 5.4 (3.6)     | 4.9 (3.6)     |        |
| <b>ICS/LABA prescriptions per patient</b> | n (% non-missing) | 347 (100.0)   | 47 (100.0)    | 161 (100.0)   | 55 (100.0)    | 0.0056 |
|                                           | Mean (SD)         | 4.1 (4.0)     | 2.6 (3.1)     | 4.7 (3.9)     | 3.9 (4.0)     |        |
| <b>Asthma related</b>                     | n (% non-missing) | 347 (100.0)   | 47 (100.0)    | 161 (100.0)   | 55 (100.0)    | 0.0177 |



|                                                      |                   |              |              |              |              |        |
|------------------------------------------------------|-------------------|--------------|--------------|--------------|--------------|--------|
| <b>accident and emergency attendance</b>             | Yes               | 0 (0.0)      | 0 (0.0)      | 0 (0.0)      | 1 (1.8)      |        |
| <b>Asthma related unplanned inpatient attendance</b> | n (% non-missing) | 347 (100.0)  | 47 (100.0)   | 161 (100.0)  | 55 (100.0)   | 0.0002 |
|                                                      | Yes               | 0 (0.0)      | 0 (0.0)      | 0 (0.0)      | 2 (3.6)      |        |
| <b>FEV<sub>1</sub>/FVC ratio</b>                     | n (% non-missing) | 45 (13.0)    | 8 (17.0)     | 21 (13.0)    | 10 (18.2)    | 0.0386 |
|                                                      | Mean (SD)         | 0.8 (0.1)    | 0.7 (0.1)    | 0.7 (0.1)    | 0.8 (0.1)    |        |
| <b>Predicted peak flow</b>                           | n (% non-missing) | 193 (55.6)   | 33 (70.2)    | 79 (49.1)    | 40 (72.7)    | 0.0038 |
|                                                      | Mean (SD)         | 498.0 (73.8) | 520.8 (67.3) | 533.5 (78.8) | 511.6 (70.0) |        |
| <b>Percentage predicted</b>                          | n (% non-missing) | 347 (100.0)  | 47 (100.0)   | 161 (100.0)  | 55 (100.0)   | 0.0418 |

|                               |                   |                |             |             |             |        |
|-------------------------------|-------------------|----------------|-------------|-------------|-------------|--------|
| <b>peak flow</b>              | Mean (SD)         | -66.7 (2103.7) | 84.5 (17.5) | 91.6 (16.0) | 86.8 (17.9) |        |
| <b>Rhinitis diagnosis</b>     | n (% non-missing) | 347 (100.0)    | 47 (100.0)  | 161 (100.0) | 55 (100.0)  | 0.0422 |
|                               | Yes               | 130 (37.5)     | 13 (27.7)   | 74 (46.0)   | 27 (49.1)   |        |
| <b>Acute OCS use (yes/no)</b> | n (% non-missing) | 347 (100.0)    | 47 (100.0)  | 161 (100.0) | 55 (100.0)  | 0.0486 |
|                               | Yes               | 93 (26.8)      | 12 (25.5)   | 40 (24.8)   | 24 (43.6)   |        |

All values in the table are n (%) unless otherwise specified. High FeNO defined as  $\geq 35$  ppb; non-high FeNO  $< 35$  ppb; high blood eosinophil count defined as  $\geq 0.300 \times 10^9$  cells/L; non-high blood eosinophil count  $< 0.300 \times 10^9$  cells/L.

BMI, body mass index; FeNO, fractional exhaled nitric oxide; FEV, forced expiratory volume; FVC, forced vital capacity; GERD, gastroesophageal reflux disease; ICS, inhaled corticosteroid; IHD, ischaemic heart disease; IQR, interquartile range; LABA, long-acting  $\beta_2$ -agonist; OCS, oral corticosteroids; ppb, parts per billion; SABA, short-acting  $\beta_2$ -agonist; SD, standard deviation.

Additional file S1: Table 3. Frequency of exacerbations between matched biomarker groups

|                         |
|-------------------------|
| <b>Categorisation 1</b> |
|-------------------------|

| <b>Asthma exacerbations</b> | <b>Non-high FeNO and non-high blood eosinophils (n=27)</b>  | <b>High FeNO and high blood eosinophils (n=27)</b>     | <b>p-value</b> |
|-----------------------------|-------------------------------------------------------------|--------------------------------------------------------|----------------|
| n (% non-missing)           | 27 (100.0)                                                  | 27 (100.0)                                             | 0.0427         |
| 0, n (%)                    | 21 (77.8)                                                   | 13 (48.1)                                              |                |
| 1, n (%)                    | 6 (22.2)                                                    | 8 (29.6)                                               |                |
| 2, n (%)                    | 0 (0.0)                                                     | 4 (14.8)                                               |                |
| 3, n (%)                    | 0 (0.0)                                                     | 2 (7.4)                                                |                |
| Mean # exacerbations (SD)   | 0.2 (0.4)                                                   | 0.8 (1.0)                                              | 0.0109         |
|                             |                                                             |                                                        |                |
|                             | <b>Non-high FeNO and non-high blood eosinophils (n=200)</b> | <b>High FeNO OR high blood eosinophils (n=200)</b>     |                |
| n (% non-missing)           | 173 (100.0)                                                 | 173 (100.0)                                            | 0.0481         |
| 0, n (%)                    | 120 (69.4)                                                  | 120 (69.4)                                             |                |
| 1, n (%)                    | 41 (23.7)                                                   | 28 (16.2)                                              |                |
| 2, n (%)                    | 11 (6.4)                                                    | 19 (11.0)                                              |                |
| 3, n (%)                    | 0 (0.0)                                                     | 5 (2.9)                                                |                |
| 4+, n (%)                   | 1 (0.6)                                                     | 1 (0.6)                                                |                |
| Mean # exacerbations (SD)   | 0.4 (0.6)                                                   | 0.5 (0.8)                                              | 0.3423         |
|                             |                                                             |                                                        |                |
| <b>Categorisation 2</b>     |                                                             |                                                        |                |
|                             | <b>Non-high FeNO and non-high blood eosinophils (n=186)</b> | <b>Non-high FeNO and high blood eosinophil (n=186)</b> |                |

|                           |                                                            |                                                        |        |
|---------------------------|------------------------------------------------------------|--------------------------------------------------------|--------|
| n (% non-missing)         | 186 (100.0)                                                | 186 (100.0)                                            | 0.2149 |
| 0, n (%)                  | 134 (72.0)                                                 | 128 (68.8)                                             |        |
| 1, n (%)                  | 36 (19.4)                                                  | 31 (16.7)                                              |        |
| 2, n (%)                  | 15 (8.1)                                                   | 20 (10.8)                                              |        |
| 3, n (%)                  | 1 (0.5)                                                    | 6 (3.2)                                                |        |
| Mean # exacerbations (SD) | 0.4 (0.7)                                                  | 0.5 (0.9)                                              | 0.3134 |
|                           |                                                            |                                                        |        |
|                           | <b>Non-high FeNO and non-high blood eosinophils (n=98)</b> | <b>High FeNO and non-high blood eosinophils (n=98)</b> |        |
| n (% non-missing)         | 98 (100.0)                                                 | 98 (100.0)                                             | 0.3126 |
| 0, n (%)                  | 72 (73.5)                                                  | 63 (64.3)                                              |        |
| 1, n (%)                  | 20 (20.4)                                                  | 24 (24.5)                                              |        |
| 2, n (%)                  | 6 (6.1)                                                    | 9 (9.2)                                                |        |
| 3, n (%)                  | 0 (0.0)                                                    | 2 (2.0)                                                |        |
| 4, n (%)                  | 0 (0.0)                                                    | 0 (0.0)                                                |        |
| Mean # exacerbations (SD) | 0.3 (0.6)                                                  | 0.5 (0.7)                                              | 0.1332 |
|                           |                                                            |                                                        |        |
|                           | <b>Non-high FeNO and non-high blood eosinophils (n=53)</b> | <b>High FeNO and high blood eosinophils (n=53)</b>     |        |
| n (% non-missing)         | 53 (100.0)                                                 | 53 (100.0)                                             | 0.3080 |
| 0, n (%)                  | 36 (67.9)                                                  | 29 (54.7)                                              |        |
| 1, n (%)                  | 12 (22.6)                                                  | 14 (26.4)                                              |        |
| 2, n (%)                  | 5 (9.4)                                                    | 8 (15.1)                                               |        |
| 3, n (%)                  | 0 (0.0)                                                    | 2 (3.8)                                                |        |
| Mean # exacerbations      | 0.4 (0.7)                                                  | 0.7 (0.9)                                              | 0.1166 |

|      |  |  |  |
|------|--|--|--|
| (SD) |  |  |  |
|------|--|--|--|

FeNO, fractional exhaled nitric oxide; SD, standard deviation.
